# Supplementary material
Source: PubMed Central journal article supplement (PMC4771311)
Supplement: AEM.03935-15_zam999116960so1.pdf [file AEM.03935-15_zam999116960so1.pdf]

Table S1. Primers used in this study

| Primer Name | Primer sequence 5' to 3'                                                | Purpose                                                     |
|-------------|-------------------------------------------------------------------------|-------------------------------------------------------------|
| csgB_UFP1   | gaaatgatttaatttctttaaagtacgaccaggtccagggtgacaacatgGTGTAGGCTGGAGCTGCTTC  | Curli <i>csgBAC</i> deletion                                |
| csgC_DRP2   | gcagaccattctctccagattcatcttatgctc gatatttcaacaaattaATGGGAATTAGCCATGGTCC | Curli <i>csgBAC</i> deletion                                |
| csgBAC_F    | gatcggtagcagggcaagaagaatgactg                                           | Curli complementation                                       |
| csgBAC_R    | gatcaagcttgaaccattctgtgggcagtt                                          | Curli complementation                                       |
| Csg_F3      | tcggtgtagtcctttcgtea                                                    | Verifying Primers for Curli mutant                          |
| Csg_R1      | attcgcagcagaccattctc                                                    | Verifying Primers for Curli mutant                          |
| rpoS_UFP1   | cttttgcttgaatgttccgtcaagggatcacgggtaggagccaccttatgGTGTAGGCTGGAGCTGCTTC  | <i>rpoS</i> deletion                                        |
| rpoS_DRP2   | gaaaaaggccagcctcgcttgagactggcctttctgacagatgcttacttaATGGGAATTAGCCATGGTCC | <i>rpoS</i> deletion                                        |
| rpoS_F      | gatcggtagcccccataacgacacaatgctg                                         | RpoS complementation                                        |
| rpoS_R      | gatcaagcttttgagtgcagaagagcagga                                          | RpoS complementation                                        |
| rpoS_UF     | cccataacgacacaatgctg                                                    | Verifying Primers for RpoS mutant (upstream <i>rpoS</i> )   |
| pKD3-c1     | ttatacgcaaggcgacaagg                                                    | Verifying Primers for RpoS mutant (upstream <i>rpoS</i> )   |
| rpoS_DR     | ttgagtgcagaagagcagga                                                    | Verifying Primers for RpoS mutant (downstream <i>rpoS</i> ) |
| pKD3-c2     | gatcttccgtcacaggtagg                                                    | Verifying Primers for RpoS mutant (downstream <i>rpoS</i> ) |
